# Supplementary material for: Gene-Edited Human-Induced Pluripotent Stem Cell Lines to Elucidate DAND5 Function throughout Cardiac Differentiation
Source: MDPI journal article supplement (doi:10.3390/cells12040520), 2023-02-05
Supplement: s1 [file s1]

Table S1 – Primer List

| Gene                    | Sequence                                                                                                                    | Annealing Temperature (°C) |
|-------------------------|-----------------------------------------------------------------------------------------------------------------------------|----------------------------|
| <i>GAPDH</i>            | Fwd 5' G CTGGTAAAGTGGATATTGTTGCCAT 3'<br>Rv 5' TGGAATCATATTGGAACATGTAAACC 3'                                                | 57.9                       |
| <i>β-ACTIN</i>          | Fwd 5' GCAAAGACCTGTACGCCAAC 3'<br>Rv 5' AGTACTTGCGCTCAGGAGGA 3'                                                             | 55                         |
| <i>MESP1</i>            | Fwd 5' AGCTTGGGTGCCTCCTTATT 3'<br>Rv 5' TGCTTCCCTGAAAGACATCA 3'                                                             | 63.1                       |
| <i>ISL1</i>             | Fwd 5' AGATTATATCAGGTTCTACGGGATCA 3'<br>Rv 5' ACACAGCGGAAACACTCGAT 3'                                                       | 57.9                       |
| <i>NKX2.5</i>           | Fwd 5' CAAGTGTGCGTCTGCCTTT 3'<br>Rv 5' CAGCTCTTTCTTTTCGGCTCTA 3'                                                            | 64.3                       |
| <i>GATA4</i>            | Fwd 5' TAGACCGTGGGTTTTGCATTG 3'<br>Rv 5' CATCCAGGTACATGGCAAACAG 3'                                                          | 57.9                       |
| <i>TNNT2</i>            | Fwd 5' TTCACCAAAGATCTGCTCCTCGCT 3'<br>Rv 5' TTATTACTGGTGTGGAGTGGGTGTGG 3'                                                   | 57.9                       |
| <i>MYH6</i>             | Fwd 5' GTCATTGCTGAAACCGAGA 3'<br>Rv 5' GCTCCTTGAGGTTGAAAAGCA 3'                                                             | 57.9                       |
| <i>MYH7</i>             | Fwd 5' ACATCATCACCCATGGAGACGAGA 3'<br>Rv 5' GCAACAGAGTTTATTGAAAAGCA 3'                                                      | 57.9                       |
| <i>TNNI1</i>            | Fwd 5' ATGGAATAGGAGGACAGTAGGT 3'<br>Rv 5' AAGAATCCAGGGCAGTAAGC 3'                                                           | 59.9                       |
| <i>TNNI3</i>            | Fwd 5' CTGCAGATTGCAAAGCAAGA 3'<br>Rv 5' CCTCCTTCTTCACCTGCTTG 3'                                                             | 59                         |
| <i>SCN1B</i>            | Fwd 5' GACCAACGCTGAGACCTTCA 3'<br>Rv 5' TCCAGCTGCAACACCTCATT 3'                                                             | 67.5                       |
| <i>RYR2</i>             | Fwd 5' GTTGTCATGATGAGGAAGATGACG 3'<br>Rv 5' CTTTGCTGGCACTGATTGTCTG 3'                                                       | 67.2                       |
| <i>DAND5</i>            | Fwd 5' GTCGACTGCTAGTGACCTTGAG 3'<br>Rv 5' TCAGGTGGAGGATACAGGACTT 3'                                                         | 60                         |
| <i>gRNA-DAND5</i>       | AAACGCTTAGCGGGGCCCTGCCTAC                                                                                                   | -                          |
| <i>ssODN (template)</i> | ATGCTCCTTGGCCAGCTATCCACTCTTCTGTGCCTGCTTG<br>CTAATAATAACCTACAGGATCCGG-<br>GAGGCCTGAACCCCAAGTCTCCTCGACCTCAG-<br>TCCTGGGCTGCAG | -                          |

**Table S2 – Antibody List**

|                      | <b>Antibody</b>                                           | <b>Host</b> | <b>Dilu-<br/>tion</b> | <b>Company Cat # and RRID</b>                                 |
|----------------------|-----------------------------------------------------------|-------------|-----------------------|---------------------------------------------------------------|
| Primary Antibodies   | NANOG                                                     | Rabbit      | 1:50                  | Abcam Cat# ab21624, RRID:AB_446437                            |
|                      | OCT4                                                      | Rabbit      | 1:400                 | Abcam Cat# ab19857, RRID:AB_445175                            |
|                      | SSEA4                                                     | Mouse       | 1:200                 | Abcam Cat# ab16287, RRID:AB_778073                            |
|                      | SMA                                                       | Mouse       | 1:600                 | Dako Cat#M0851, RRID:AB_2223500                               |
|                      | AFP                                                       | Rabbit      | 1:200                 | Dako Cat#A0008, RRID:AB_2650473                               |
|                      | TUBB3                                                     | Mouse       | 1:100                 | Sigma-Aldrich Cat# 065M4820V                                  |
|                      | $\alpha$ -ACTININ                                         | Mouse       | 1:800                 | Sigma-Aldrich Cat# A7811, RRID:AB_476766                      |
|                      | MLC2v                                                     | Rabbit      | 1:200                 | Proteintech Cat# 10906-1-AP, RRID:AB_2147453                  |
|                      | TNNT2                                                     | Mouse       | 1:250                 | Thermo Fisher Scientific Cat# MA5-12960, RRID:AB_11000742     |
|                      | Cx43                                                      | Goat        | 1:500                 | SICGEN Cat# AB0016                                            |
| Secondary Antibodies | Alexa Fluor 488-conjugated Donkey anti-mouse IgG (H + L)  | Donkey      | 1:300                 | Jackson ImmunoResearch Labs Cat# 715-545-150, RRID:AB_2340846 |
|                      | Alexa Fluor 488-conjugated Donkey anti-Rabbit IgG (H + L) | Donkey      | 1:300                 | Jackson ImmunoResearch Labs Cat# 711-545-152, RRID:AB_2313584 |
|                      | Alexa Fluor 594-conjugated Donkey anti-Mouse IgG (H + L)  | Donkey      | 1:300                 | Thermo Fisher Scientific Cat# A-21203, RRID:AB_141633         |
|                      | Alexa Fluor 633-conjugated Donkey anti-Goat IgG (H + L)   | Donkey      | 1:300                 | Thermo Fisher Scientific Cat# A21082, RRID:AB_10562400        |
